# Supplementary material
Source: HighWire-hosted journal article supplement (https://bmjopen.bmj.com/content/9/6/e027371)
Supplement: inline-supplementary-material-1 [file inline-supplementary-material-1.pdf]

**Group 1**  
Study Number:

Ethics Number:

**Questionnaire**

**Study Title**

**Know Your Numbers (KYN): Adding Primary Prevention to the NHS Breast Screening Programme Phase I**

**Researchers: Dr Ellen Copson, Dr Julia Sinclair, Dr L. Brierley-Jones, Dr Mark McCann and Ellena Sheldon.**

*There are 6 sections to this questionnaire, please fill in all sections. If you have any questions, either ask the research assistant or contact us using the details on the participant information sheet.*

*Example: **What colour is a clear sky?***

- Yellow
- Blue (answer that has been selected)
- Purple

**Section 1. Please tick the box which most applies to you.**

|            |                                                                          |                                                       |                                                           |                               |
|------------|--------------------------------------------------------------------------|-------------------------------------------------------|-----------------------------------------------------------|-------------------------------|
| <b>Q1.</b> | <b>What is your sex?</b>                                                 |                                                       |                                                           |                               |
|            | <input type="radio"/> Female                                             |                                                       | <input type="radio"/> Male                                |                               |
| <b>Q2.</b> | <b>How old are you?</b>                                                  |                                                       |                                                           |                               |
|            | <input type="radio"/> 40 or under                                        | <input type="radio"/> 41 - 50                         | <input type="radio"/> 51 - 60                             | <input type="radio"/> 61 - 70 |
| <b>Q3.</b> | <b>What is your ethnicity?</b>                                           |                                                       |                                                           |                               |
|            | <input type="radio"/> White British                                      | <input type="radio"/> African                         | <input type="radio"/> Chinese                             |                               |
|            | <input type="radio"/> White Irish                                        | <input type="radio"/> Caribbean                       | <input type="radio"/> Bangladeshi                         |                               |
|            | <input type="radio"/> Any other white background                         | <input type="radio"/> Mixed white and black Caribbean | <input type="radio"/> Mixed white and Asian               |                               |
|            | <input type="radio"/> Mixed white and Black African                      | <input type="radio"/> Any other black background      | <input type="radio"/> Any other Asian background          |                               |
|            | <input type="radio"/> Any other ethnic group                             | <input type="radio"/> Not known                       |                                                           |                               |
| <b>Q4.</b> | <b>What is your legal, marital or same-sex civil partnership status?</b> |                                                       |                                                           |                               |
|            | <input type="radio"/> Never married or in same-sex civil partnership     | <input type="radio"/> Married                         | <input type="radio"/> Separated but still legally married |                               |
|            | <input type="radio"/> Divorced                                           | <input type="radio"/> Widowed                         |                                                           |                               |

**Group 1**

|            |                                                               |                                                                                                  |
|------------|---------------------------------------------------------------|--------------------------------------------------------------------------------------------------|
| <b>Q5.</b> | <b>What is your main occupation? (please tick one circle)</b> |                                                                                                  |
|            | <input type="radio"/> Working as an employee                  | <input type="radio"/> On a government sponsored training programme                               |
|            | <input type="radio"/> Self-employed or freelance              | <input type="radio"/> Away from work ill, on maternity leave, on holiday or temporarily laid off |
|            | <input type="radio"/> Doing any other kind of paid work       | <input type="radio"/> Retired                                                                    |
|            | <input type="radio"/> Student or in full time education       | <input type="radio"/> Looking after the home or family                                           |
|            | <input type="radio"/> Long term sick or disabled              |                                                                                                  |

|            |                                                                                                               |                                                                              |
|------------|---------------------------------------------------------------------------------------------------------------|------------------------------------------------------------------------------|
| <b>Q6.</b> | <b>What is your highest qualification? (tick one circle)</b>                                                  |                                                                              |
|            | <input type="radio"/> University degree                                                                       | <input type="radio"/> CSE grades 2-5, O level D&E, GCSE grades D-G), NVQ 1-2 |
|            | <input type="radio"/> Teaching qualification or HNC/HND/BETEC higher                                          | <input type="radio"/> CSE or GCSE ungraded                                   |
|            | <input type="radio"/> A or A/S levels/SCE higher or ONC/OND/BETEC/City and Guilds Advanced Final Level, NVQ 4 | <input type="radio"/> Other qualifications                                   |
|            | <input type="radio"/> O Level or GCSE (A-C) or CSE Grade 1 or City & Guilds Craft/Ord level, NVQ 3            | <input type="radio"/> No qualifications                                      |
| <b>Q7.</b> | <b>What are the <u>first</u> four digits of your postcode?</b>                                                |                                                                              |
|            | <input type="text"/>                                                                                          | <input type="text"/>                                                         |

**Section 2. Please tick the circle which most applies to you.**

|             |                                                                                        |                                                            |                                                      |                            |                                |
|-------------|----------------------------------------------------------------------------------------|------------------------------------------------------------|------------------------------------------------------|----------------------------|--------------------------------|
| <b>Q8.</b>  | <b>How is your health in general?</b>                                                  |                                                            |                                                      |                            |                                |
|             | <input type="radio"/> Very good                                                        | <input type="radio"/> Good                                 | <input type="radio"/> Fair                           | <input type="radio"/> Bad  | <input type="radio"/> Very bad |
| <b>Q9.</b>  | <b>Have you ever been investigated/screened for breast cancer? Tick all that apply</b> |                                                            |                                                      |                            |                                |
|             | <input type="radio"/> Attended routine breast screening                                | <input type="radio"/> Been investigated following symptoms | <input type="radio"/> Been treated for breast cancer | <input type="radio"/> None |                                |
| <b>Q19.</b> | <b>What is your....</b>                                                                |                                                            |                                                      |                            |                                |
|             | Weight? .....                                                                          |                                                            |                                                      | Height? .....              |                                |
| <b>Q11.</b> | <b>Do you smoke?</b>                                                                   |                                                            |                                                      |                            |                                |
|             | <input type="radio"/> Current smoker                                                   | <input type="radio"/> Ex-smoker                            | <input type="radio"/> Never smoked                   |                            |                                |

**Group 1**  
**Section 3.**

|             |                                                                                                                                                              |  |  |
|-------------|--------------------------------------------------------------------------------------------------------------------------------------------------------------|--|--|
| <b>Q12.</b> | <b>Q14. Please write down anything that you think might increase the risk of breast cancer and then put a star by the ones you think are most important.</b> |  |  |
|             | e.g being female *                                                                                                                                           |  |  |
|             |                                                                                                                                                              |  |  |
|             |                                                                                                                                                              |  |  |

**Section 4.**

We are interested to know your thoughts on the impact of adding specific cancer prevention information to the breast cancer screening process.

**If a 5 minute cancer prevention information session were added to the breast screening process/ at clinic:**

|             |                                                                                                                                                                                                                                                                         |
|-------------|-------------------------------------------------------------------------------------------------------------------------------------------------------------------------------------------------------------------------------------------------------------------------|
| <b>Q13.</b> | <b>What do you think would be the potential advantages? (write below)</b>                                                                                                                                                                                               |
|             |                                                                                                                                                                                                                                                                         |
|             |                                                                                                                                                                                                                                                                         |
| <b>Q14.</b> | <b>What do you think would be the potential disadvantages? (write below)</b>                                                                                                                                                                                            |
|             |                                                                                                                                                                                                                                                                         |
|             |                                                                                                                                                                                                                                                                         |
| <b>Q15.</b> | <b>Would this additional 5 minute cancer prevention information session make a difference to whether you would attend screening/clinic?</b>                                                                                                                             |
|             | <input type="radio"/> More likely to come to screening/ clinic<br><input type="radio"/> Less likely to come to screening/ clinic<br><input type="radio"/> Make no difference                                                                                            |
| <b>Q16.</b> | <b>What would be your preferred method for exchanging this information?</b>                                                                                                                                                                                             |
|             | <input type="radio"/> it to be electronic (ie answer questions on a touch screen whilst waiting)<br><input type="radio"/> postal<br><input type="radio"/> trained nurse<br><input type="radio"/> trained volunteer<br><input type="radio"/> other – please specify..... |

**Group 1**  
**Section 5.**

|             |                                                                                                                       |                                                                                     |                          |                          |
|-------------|-----------------------------------------------------------------------------------------------------------------------|-------------------------------------------------------------------------------------|--------------------------|--------------------------|
| <b>Q17.</b> | <b>Do you drink alcohol?</b>                                                                                          |                                                                                     |                          |                          |
|             | <input type="radio"/> Yes<br><input type="radio"/> No (go to Q22.)                                                    |                                                                                     |                          |                          |
| <b>Q18.</b> | <b>Do you know how much alcohol is in a drink?</b>                                                                    |                                                                                     |                          |                          |
|             | <input type="radio"/> Yes<br><input type="radio"/> No (go to Q22.)                                                    |                                                                                     |                          |                          |
| <b>Q19.</b> | <b>How would you work out or find out how much alcohol (in units) is in a drink?</b>                                  |                                                                                     |                          |                          |
|             | (Explain below)                                                                                                       |                                                                                     |                          |                          |
| <b>Q20.</b> | <b>Quiz. Answer the questions to the nearest unit. Answer to the best of your knowledge. Tick one correct answer.</b> |                                                                                     |                          |                          |
| <b>Q21.</b> | <b>A</b>                                                                                                              | How many units of alcohol are in a <i>medium glass of wine</i> (12% ABV of 175ml)?  |                          |                          |
|             |                                                                                                                       | <input type="radio"/> 1                                                             | <input type="radio"/> 2  | <input type="radio"/> 4  |
|             | <b>B</b>                                                                                                              | How many units of alcohol are in a <i>pint of beer</i> (4% ABV of 586ml)?           |                          |                          |
|             |                                                                                                                       | <input type="radio"/> 1                                                             | <input type="radio"/> 2  | <input type="radio"/> 4  |
|             | <b>C</b>                                                                                                              | How many units of alcohol are in a <i>1litre bottle of cider</i> (7% of 1000ml ABV) |                          |                          |
|             |                                                                                                                       | <input type="radio"/> 3                                                             | <input type="radio"/> 5  | <input type="radio"/> 7  |
|             | <b>D</b>                                                                                                              | How many units are there in a <i>standard bottle of vodka</i> (40%, ABV, 700ml)?    |                          |                          |
|             |                                                                                                                       | <input type="radio"/> 20                                                            | <input type="radio"/> 30 | <input type="radio"/> 40 |

**Group 1**

**Section 6.**  
**Focus group**

We would like to invite you, and up to two female friends to a focus group to discuss more about breast cancer prevention.

**Q23. Would you be interested in attending a meeting to discuss this questionnaire and the idea of adding cancer prevention to screening?**

- Yes, please fill in contact details below.
- No, we do not need any contact details.

**Contact details**

Name:

(Please fill in at least one below)  
Phone number:

Email:

Address:

**Thank you very much for taking the time to complete this questionnaire.**
