# Supplementary material
Source: HighWire-hosted journal article supplement (https://bmjopen.bmj.com/content/9/6/e027371)
Supplement: inline-supplementary-material-2 [file inline-supplementary-material-2.pdf]

Appendix B – coding framework for survey responses

|                                     | <b>Convincing/ probable/ limited</b>                                                                                                                                   | <b>No substantial evidence</b>                                                           |
|-------------------------------------|------------------------------------------------------------------------------------------------------------------------------------------------------------------------|------------------------------------------------------------------------------------------|
| <b>Modifiable risk factors</b>      | Obesity/ Poor diet<br>Lack of exercise<br>Alcohol<br>Hormone medication<br>Work patterns Stress<br>smoking                                                             | Deodorants, antiperspirants<br>Underwired bras<br>Abortion,<br>Breast implants,          |
| <b>Non- modifiable risk factors</b> | Family History/ genetics<br>Age<br>Height<br>Higher SE class Longer menarche<br>History of previous cancer<br>Nulliparity<br>Previous Ionising radiation<br>Female sex | Non-ionising radiation,<br>Environmental chemicals<br>Bumping or bruising the<br>breast, |

<http://www.cancerresearchuk.org/about-cancer/breast-cancer/risks-causes/risk-factors>.  
<http://breastcancer.org/about-breast-cancer/what-can-cause-breast-cancer>
