# Supplementary material
Source: HighWire-hosted journal article supplement (https://bmjopen.bmj.com/content/9/6/e027371)
Supplement: inline-supplementary-material-3 [file inline-supplementary-material-3.pdf]

Table 1: topic guide and interview prompts

A: Topic guide for focus groups

*(exact nature of these questions will be determined in part by the responses to the questionnaire - for example see question 2, where the question will be phrased based on reply to the survey)*

- 1) **When you hear the phrase 'breast cancer risk factors' what does that mean to you? What comes to mind?**
- 2) **Responses to the questionnaire indicated that x, y, and z are perceived as the most significant risk factors for cancer. To what extent do you agree with these (or not)? Why (or why not)?**
- 3) **How do you feel about discussing/hearing about cancer and the risk factors associated with it? Is it different discussing it here compared to other settings (e.g, clinical, with family/friends/at work etc).**
- 4) **How do you view cancer vis-a-vis other diseases**
- 5) **In view of the foregoing discussion, how would you feel about introducing a 5-minute cancer prevention information session to the breast screening process/at a clinic?**

B: Interview Guide for Key Opinion Leaders and clinic staff:

*(With the caveat that some of these questions will relate to/ be modified in relation to responses from the questionnaire)*

- 1) **The questionnaire shows that staff frequently/ occasionally/ never discuss breast cancer risks with patients**

*Why do you think that is? What makes it difficult/ easy to do this?*

- 2) **There is an initiative to add cancer prevention information to breast screening clinics- can you tell me your thoughts on this?**

a. *In your view would it deter women from attending subsequent screening. If so why?*

- 3) **What is your understanding of the relationship between alcohol and breast cancer?**

- 4) **Would you be comfortable discussing alcohol with patients? Would you be comfortable discussing LEVELS of consumption? Would you be comfortable giving advice/public health information/recommendations to reduce alcohol consumption levels?**

a. **If not, why not? What would make this easier? Do-able?**
